# Supplementary material for: Palaeoclimate significance of speleothems in crystalline rocks: a test case from the Late Glacial and early Holocene (Vinschgau, northern Italy)
Source: Copernicus journal article supplement (doi:10.5194/cp-14-369-2018), 2018-03-16
Supplement: Supplementary file 1 [file cp-14-369-2018-supplement.zip]

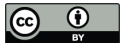

## *Supplement of*

# **Palaeoclimate significance of speleothems in crystalline rocks: a test case from the Late Glacial and early Holocene (Vinschgau, northern Italy)**

**Gabriella Koltai et al.**

*Correspondence to:* Gabriella Koltai ([gabriella.koltai@uibk.ac.at](mailto:gabriella.koltai@uibk.ac.at))

- [cp-14-369-2018-supplement-title-page.pdf](#)
- Supplement
  - [Suppl. Fig. 1.png](#)
  - [Suppl. Fig. 2.png](#)
  - [Suppl. Fig. 3.png](#)
  - [Suppl. Table 1.docx](#)

The copyright of individual parts of the supplement might differ from the CC BY 4.0 License.
